# Supplementary material for: Preparation of Novel Mesoporous LaFeO3-SBA-15-CTA Support for Syngas Formation of Dry Reforming
Source: MDPI journal article supplement (doi:10.3390/nano12091451), 2022-04-24
Supplement: s1 [file s1]

# Preparation of Novel Mesoporous LaFeO<sub>3</sub>-SBA-15-CTA Support for Syngas Formation of Dry Reforming

Luming Li <sup>1,2,3</sup>, Song Wu <sup>1</sup>, Hongmei Li <sup>1</sup>, Jie Deng <sup>1,\*</sup> and Junshan Li <sup>2,\*</sup>

<sup>1</sup> College of Food and Biological Engineering, Chengdu University, Chengdu 610106, China; liluming@cdu.edu.cn (L.M.); wusong@stu.cdu.edu.cn (S.W.); lihongmei@cdu.edu.cn (H.M.); dengjie@cdu.edu.cn (J).

<sup>2</sup> Institute for Advanced Study, Chengdu University, Chengdu 610106, China; liluming@cdu.edu.cn (L.M.); lijunshan@cdu.edu.cn (J.S.).

<sup>3</sup> Department of Chemical Engineering, Sichuan University, Chengdu 610065, China; liluming@cdu.edu.cn (L.M.).

\* Correspondence: dengjie@cdu.edu.cn (J); lijunshan@cdu.edu.cn (J.S.).

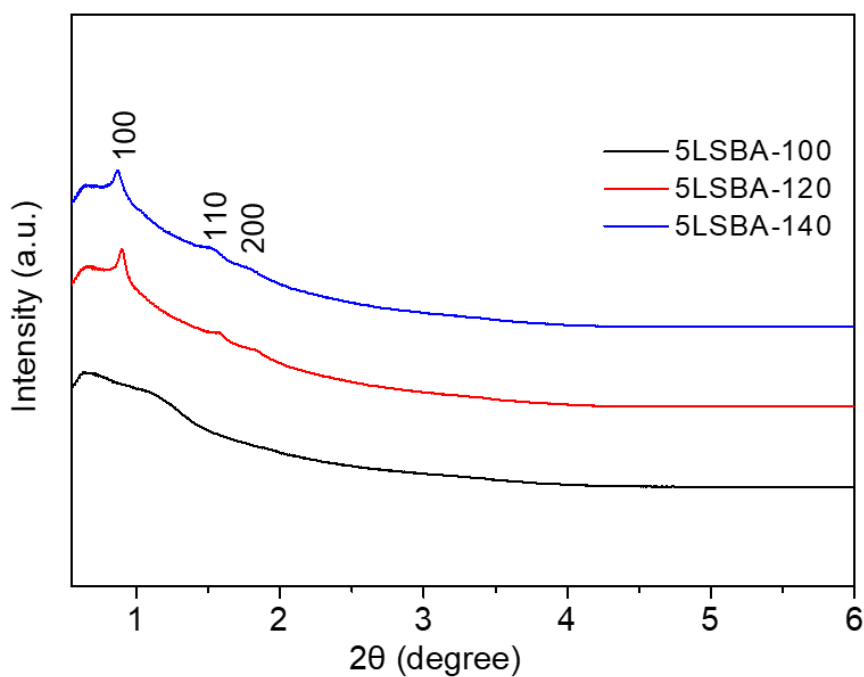

**Figure S1.** Small-angle XRD patterns of the LaFeO<sub>3</sub>-SBA-15-CTA supports.

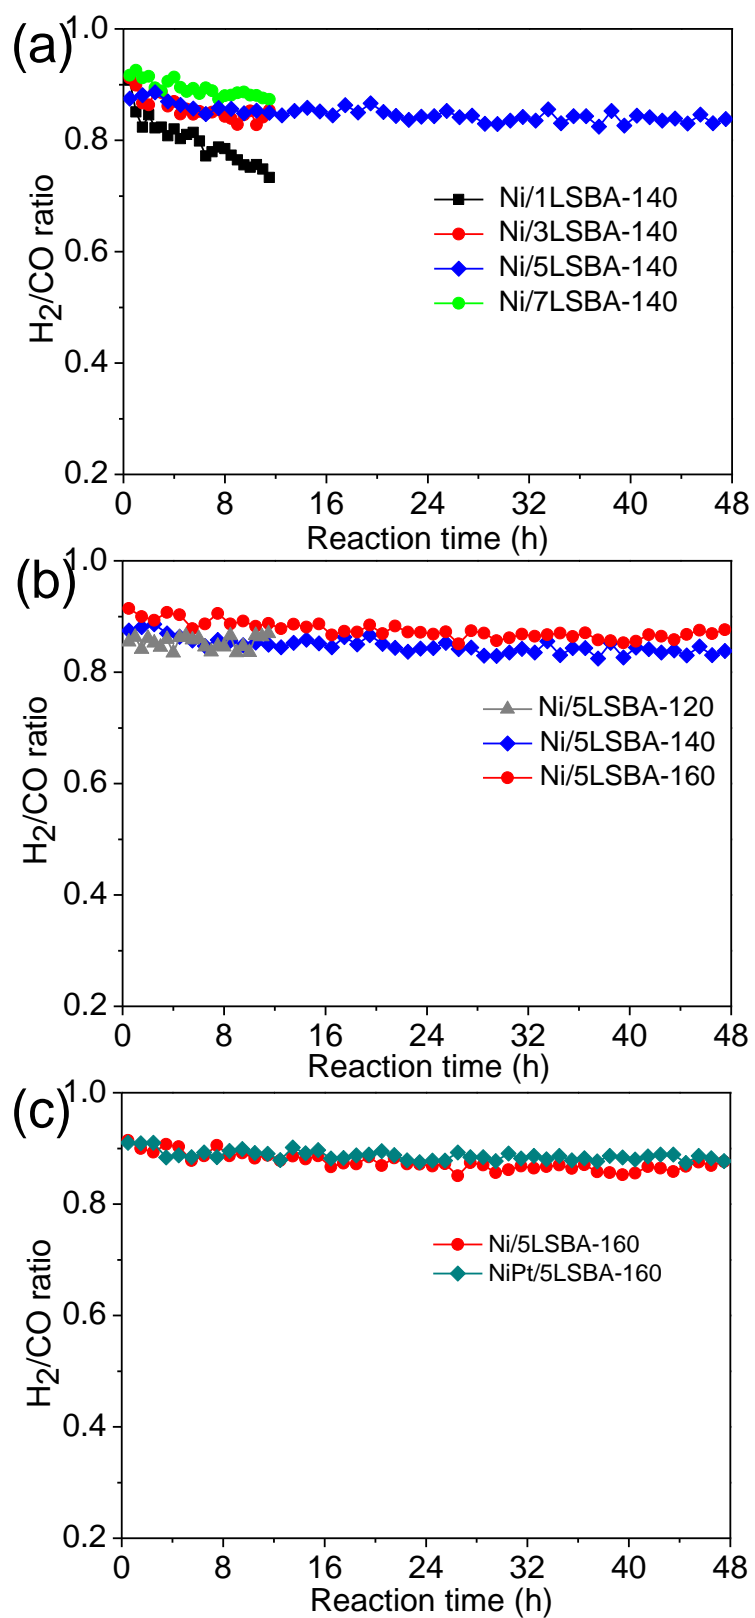

**Figure S2.** The enhanced catalytic performance on Ni(Pt)/yLSBA-T catalysts by adjusting the  $LaFeO_3$  loading (a) and hydrothermal temperature (b) as well as the Pt modification (c). (GHSV=20,000  $mL \cdot g_{cat}^{-1} \cdot h^{-1}$ ).

**Table S1.** Preparation conditions and grain sizes of the synthesized catalysts.

| <b>Sample name.</b>            | <b>LaFeO<sub>3</sub> content<br/>(wt.%)</b> | <b>Hydrothermal temperature<br/>(°C)</b> | <b>Particle size of NiO<br/>(nm)</b> |
|--------------------------------|---------------------------------------------|------------------------------------------|--------------------------------------|
| NiO/3LSBA-140                  | 30                                          | 140                                      | 18.2                                 |
| NiO/5LSBA-140                  | 50                                          | 140                                      | 14.3                                 |
| NiO/7LSBA-140                  | 70                                          | 140                                      | 12.8                                 |
| NiO/5LSBA-120                  | 50                                          | 120                                      | 15.3                                 |
| NiO/5LSBA-160                  | 50                                          | 160                                      | 13.2                                 |
| NiOPtO <sub>x</sub> /5LSBA-160 | 50                                          | 160                                      | 13.0                                 |
